# Supplementary material for: Highly permeable membrane materials for CO2 capture
Source: Royal Society of Chemistry journal article supplement (doi:10.1039/c3ta13066e), 2013-01-01
Supplement: c3ta13066e.pdf [file c3ta13066e.pdf]

## Supporting Information

### Highly Permeable Membrane Materials for CO<sub>2</sub> Capture

Qiang Fu,<sup>1,2</sup> Andri Halim,<sup>1,2</sup> Jinguk Kim,<sup>1,2</sup> Joel Scofield,<sup>1,2</sup> Paul A. Gurr,<sup>1,2</sup> Sandra E. Kentish<sup>1</sup> and Greg G. Qiao<sup>1,2\*</sup>

<sup>1</sup> Cooperative Research Centre for Greenhouse Gas Technologies, Department of Chemical and Biomolecular Engineering, The University of Melbourne, VIC 3010, Australia.

<sup>2</sup> Polymer Science Group, Department of Chemical and Biomolecular Engineering, The University of Melbourne, VIC 3010, Australia

\* Corresponding author. Tel: +61 3 83448665; Fax: +61 3 8344 4153.

E-mail address: [gregghq@unimelb.edu.au](mailto:gregghq@unimelb.edu.au) (G. G. Qiao)



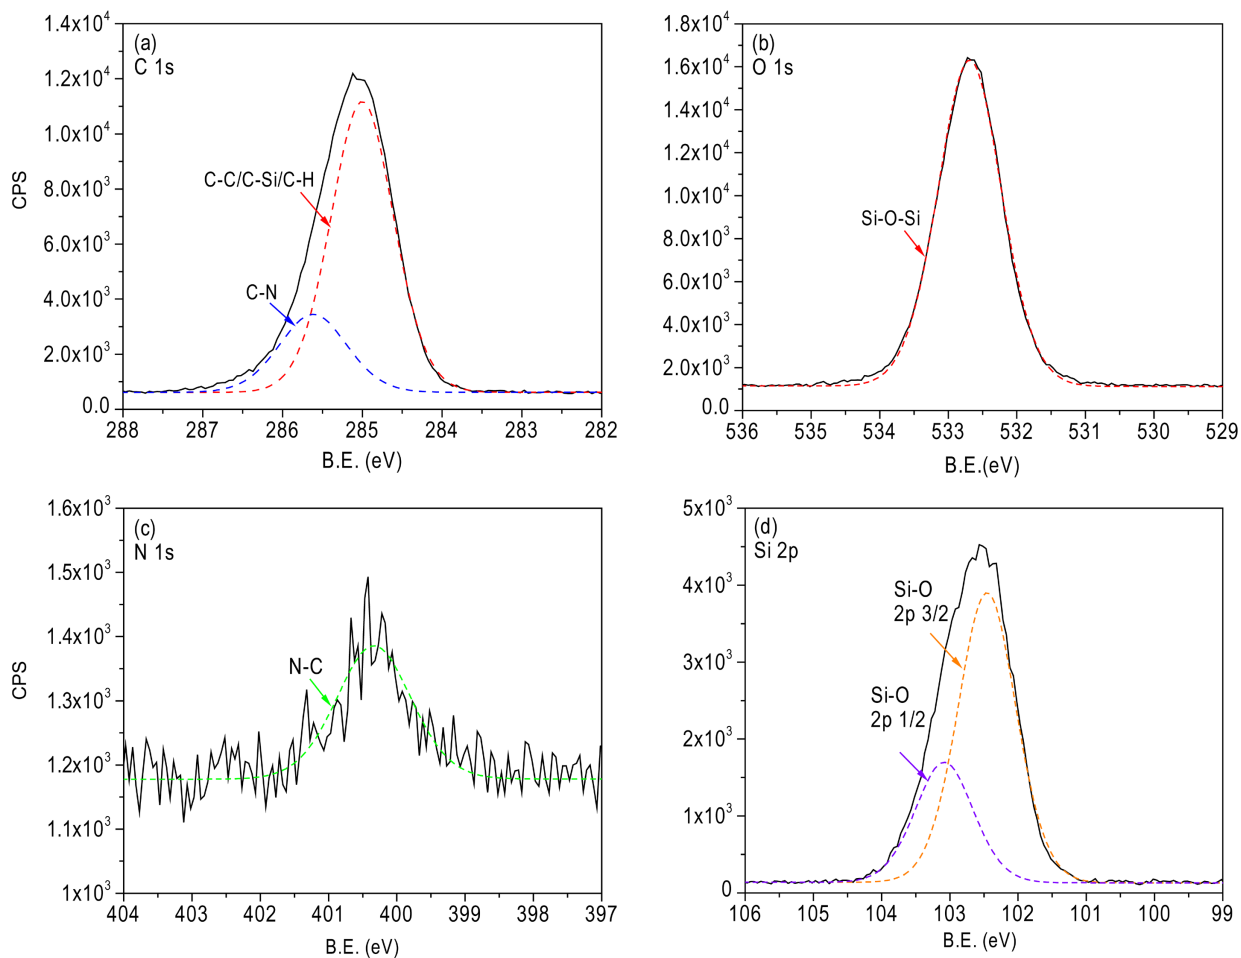

**Figure S1.** XPS C 1s (a), O 1s (b), N 1s (c) and Si 2p (d) high-resolution lines for the cross-linked PDMS gutter layer.

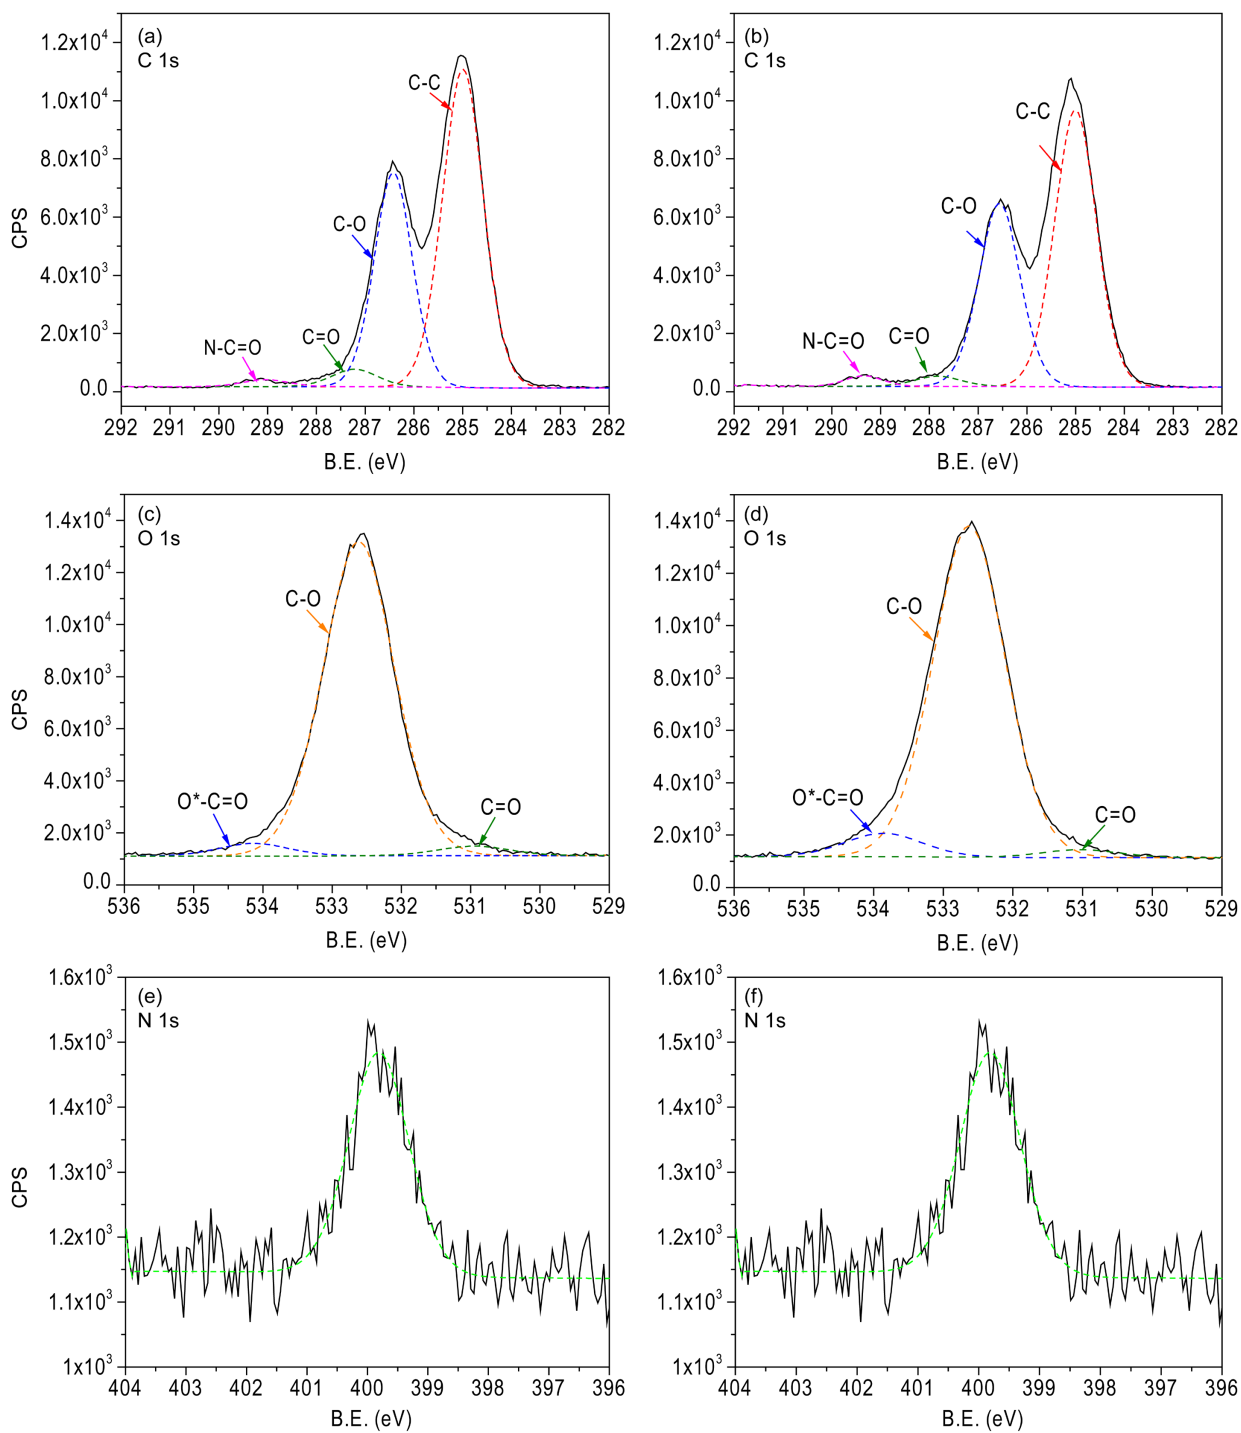

**Figure S2.** XPS C 1s, O 1s and N 1s high-resolution lines of the Pebax<sup>®</sup> 2533 active layer (a, c and e) and P1-50 (Pebax<sup>®</sup> 2533/P1 wt. 50%) active layer (b, d and f).
